# Supplementary figures and images for: Looking for Visitor’s Effect in Sanctuaries: Implications of Guided Visitor Groups on the Behavior of the Chimpanzees at Fundació Mona
Source: MDPI journal article supplement (doi:10.3390/ani9060347), 2019-06-13

Normal Q-Q

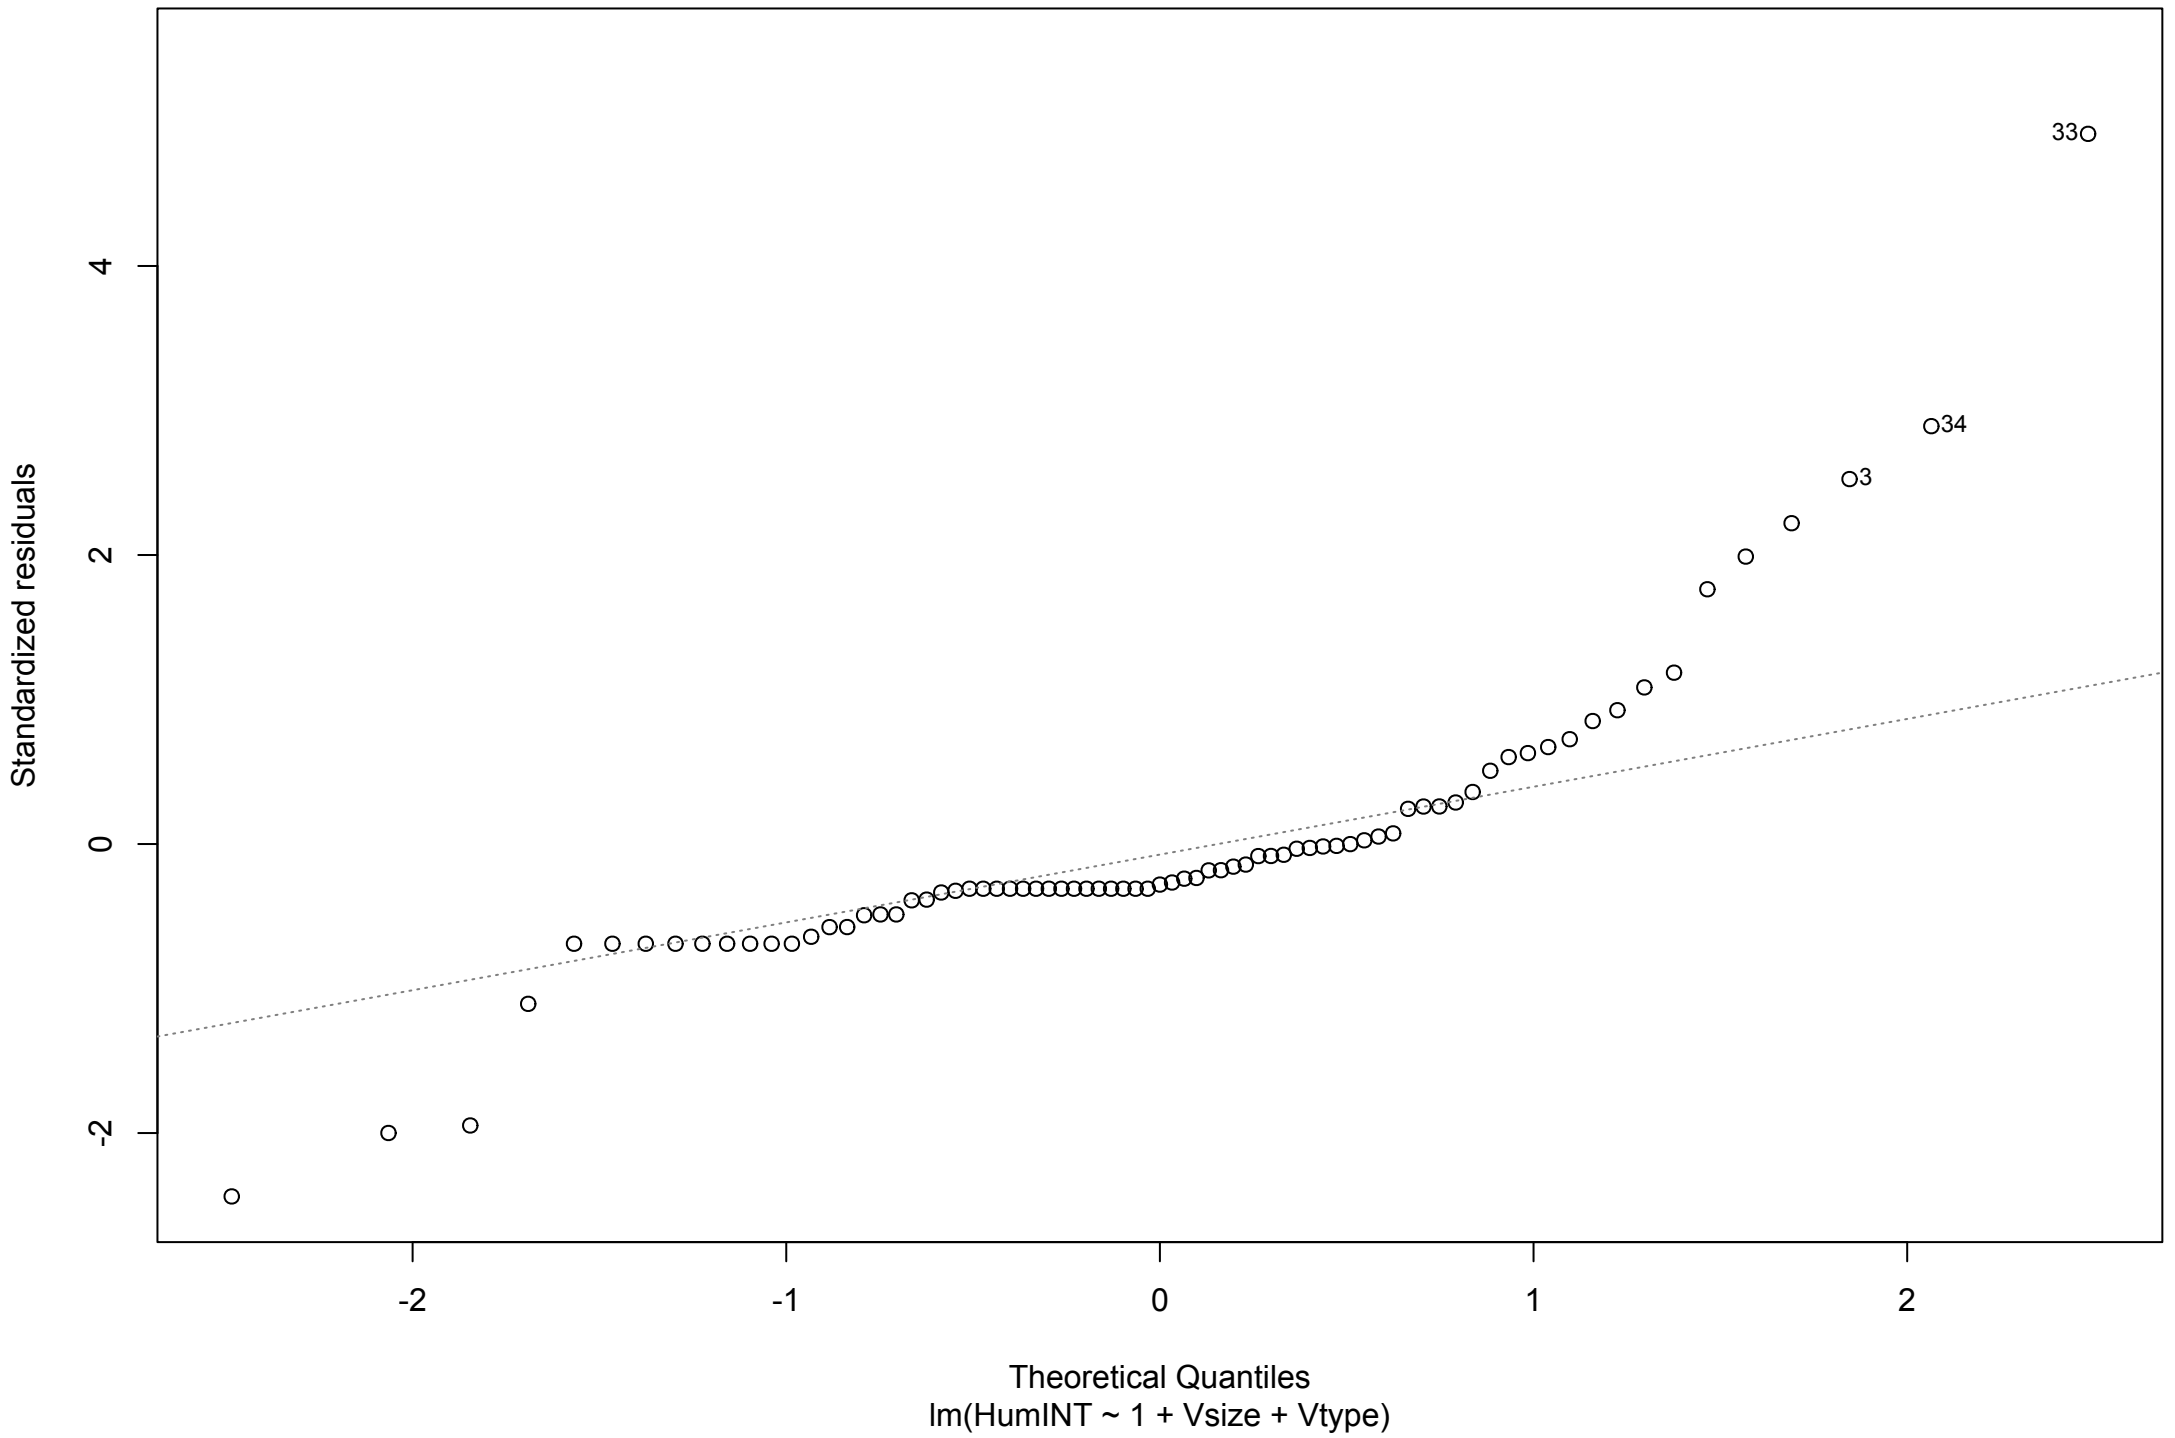

Supplement: s1 [file s1]

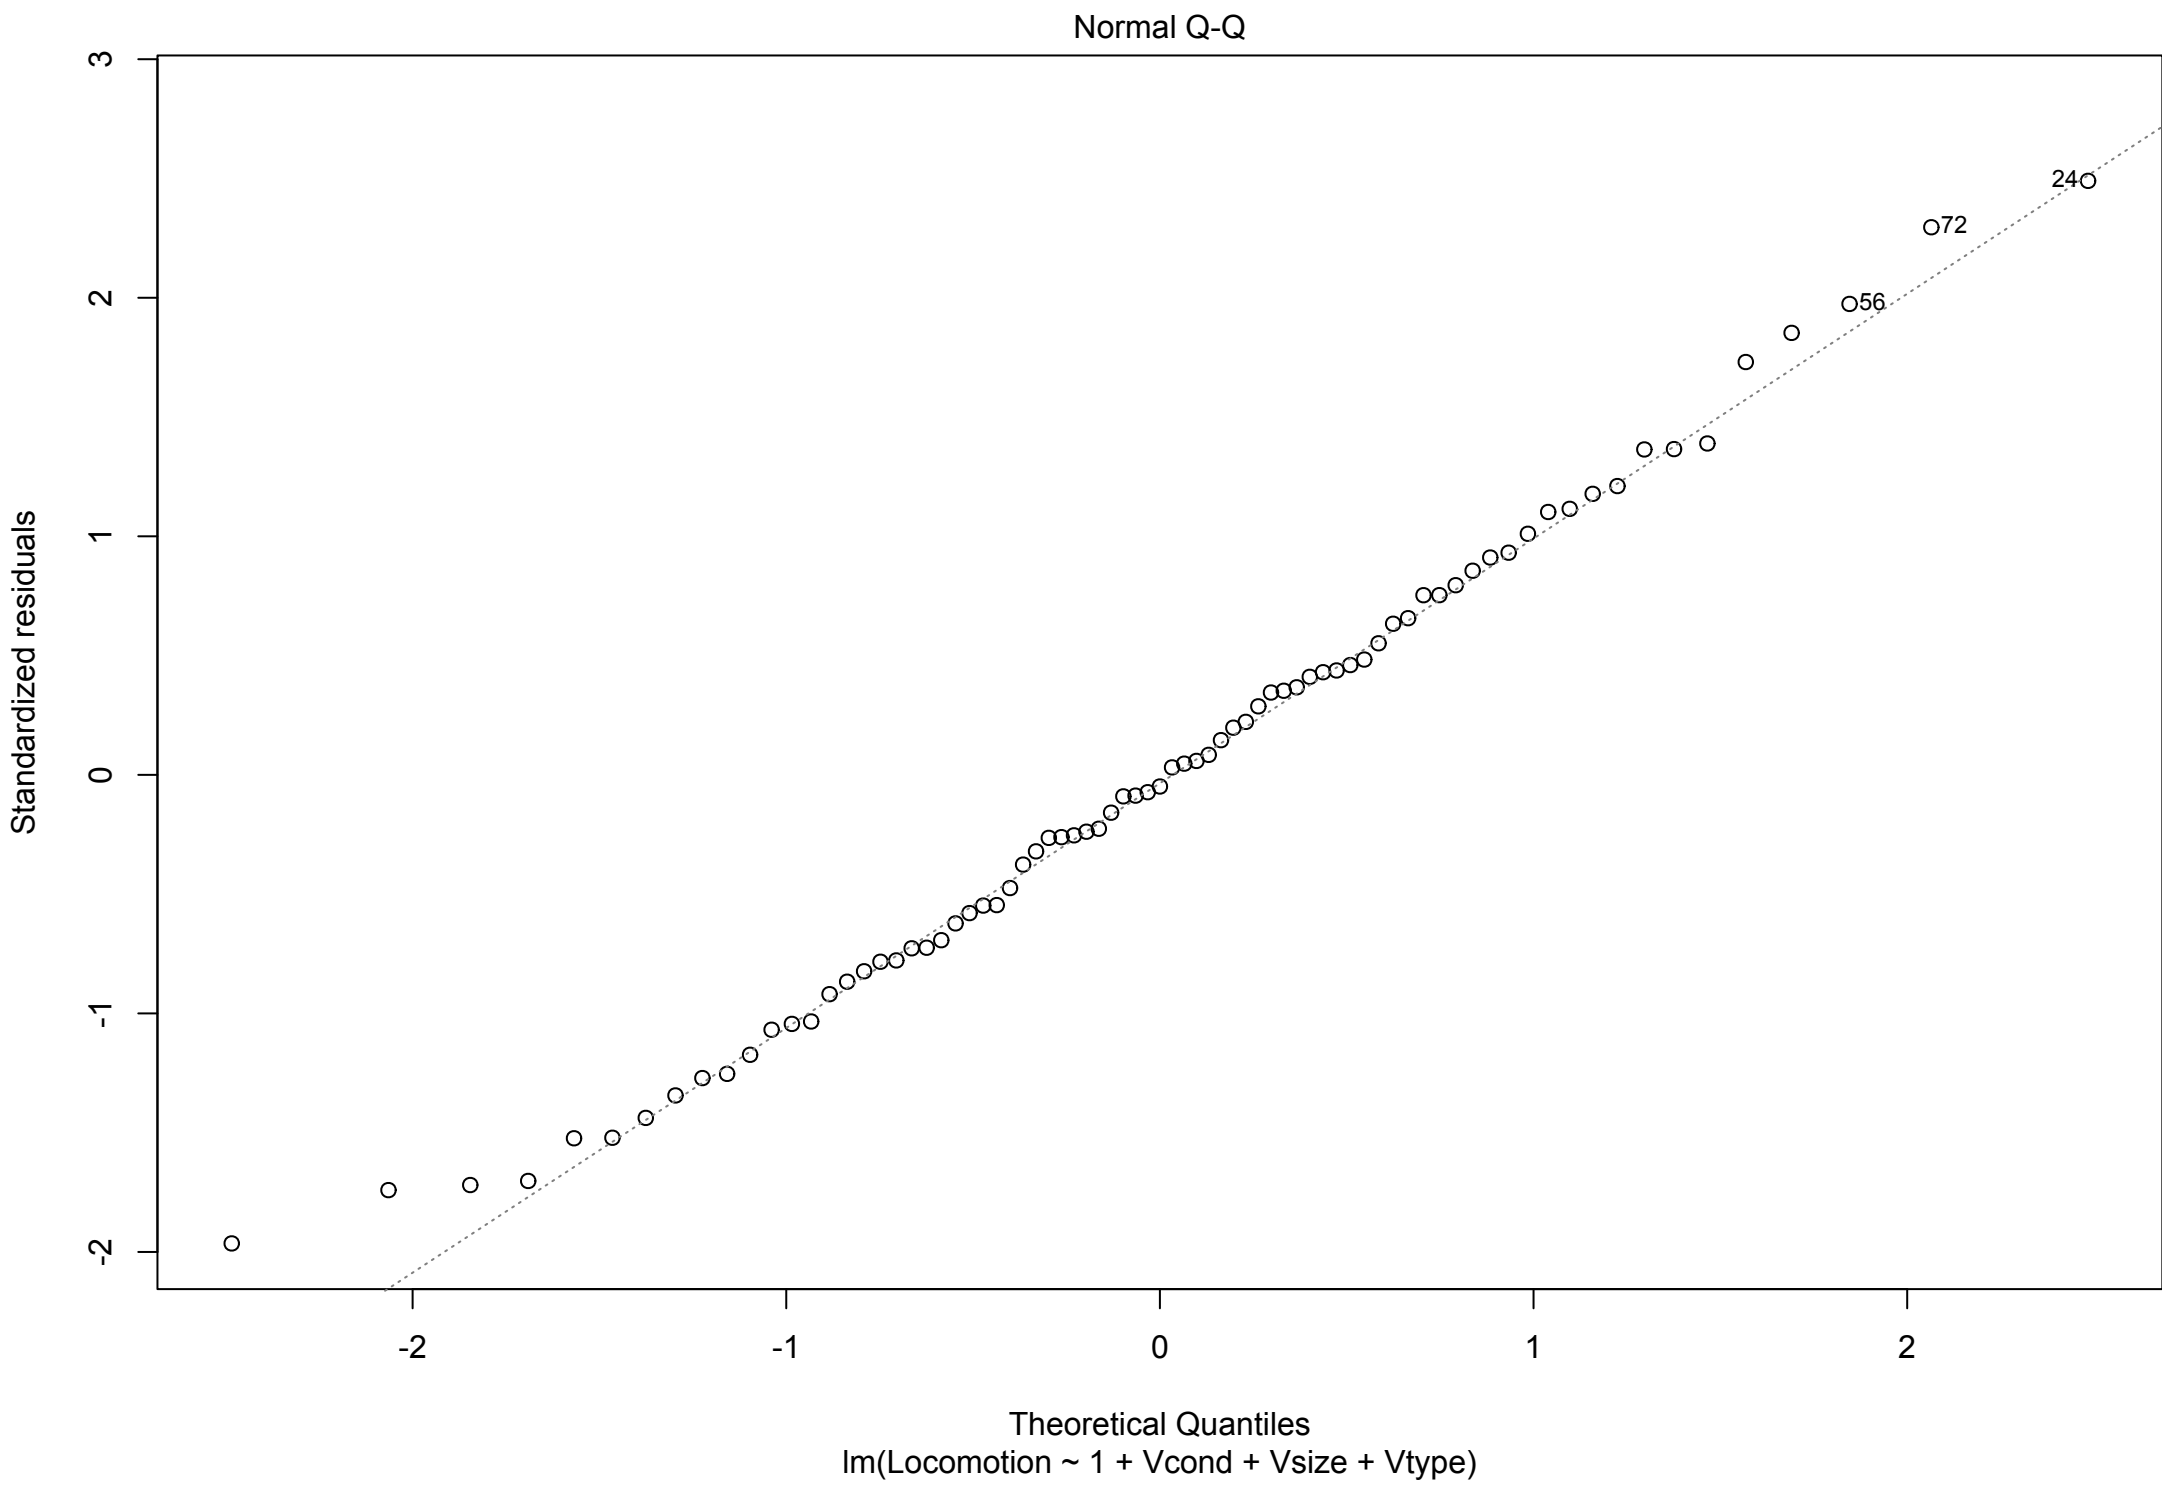

Supplement: s1 [file s1]
